# Supplementary material for: Restoring Genetic Resource through In Vitro Culturing Testicular Cells from the Cryo-Preserved Tissue of the American Shad (Alosa sapidissima)
Source: MDPI journal article supplement (doi:10.3390/biology11050790), 2022-05-22
Supplement: s1 [file s1]

a.

| Age (month) | Body weight (g) | Average gonad index (%) |
|-------------|-----------------|-------------------------|
| 7           | 250.0-300.0     | 0.58                    |
| 15          | 550.0-625.0     | 2.08                    |
| 24          | 628.0-850.0     | 6.46                    |

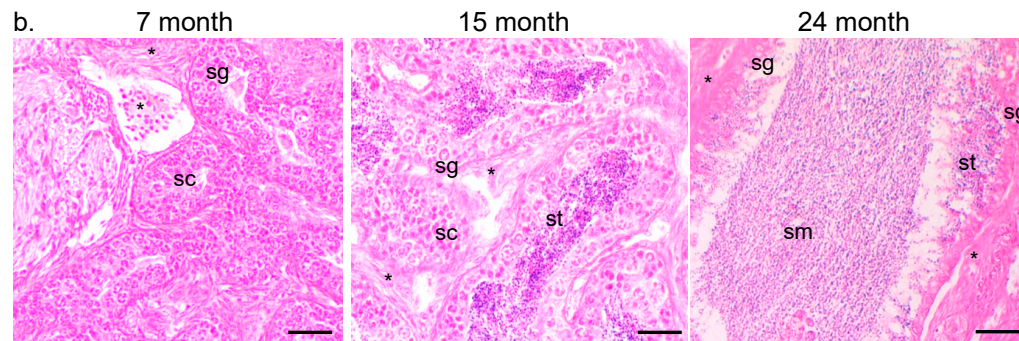

**Figure S1. Development of testis in American shad**

a. Totally, 30 fish including 10 fish at each age were determined for the gonad index of testis at different age. b. the cellular composition of testis at different ages. sg, spermatogonia. sc, spermatocytes. st, spermatids. sm, spermatozoa and somatic\_cells\_indicated\_with\_asterisks. Scale bars, 50  $\mu$ m.

**Table S1. The cell composition of post-thaw American shad testes**

| Cell types                 | Proportions of cells (%) |                |                |                |
|----------------------------|--------------------------|----------------|----------------|----------------|
|                            | 7-month-old              |                | 24-month-old   |                |
|                            | Isolated cells           | Tissue blocks  | Isolated cells | Tissue blocks  |
| Spermatogonia              | 26.0 $\pm$ 6.0           | 28.9 $\pm$ 0.2 | 13.2 $\pm$ 0.9 | 16.1 $\pm$ 1.2 |
| Spermatocytes              | 47.8 $\pm$ 5.8           | 39.4 $\pm$ 3.9 | 7.6 $\pm$ 0.5  | 10.5 $\pm$ 1.0 |
| Spermatids and other cells | 19.2 $\pm$ 0.2           | 31.8 $\pm$ 3.7 | 79.2 $\pm$ 0.4 | 73.4 $\pm$ 2.6 |

The testicular cells were dissociated fresh testis of 7-month-old and 24-month-old, stained by Hoechst 33342 (MP Biomedicals), PI/Vasa for a brief determination of cell composition testicular cells, and the cells were briefly classified into 3 groups, including spermatogonia, spermatocytes, spermatids and other cells. The data are shown in percentage (%) and the mean  $\pm$  SEM, n=12 (3 fish x 2 tubes of samples x 2 counts).

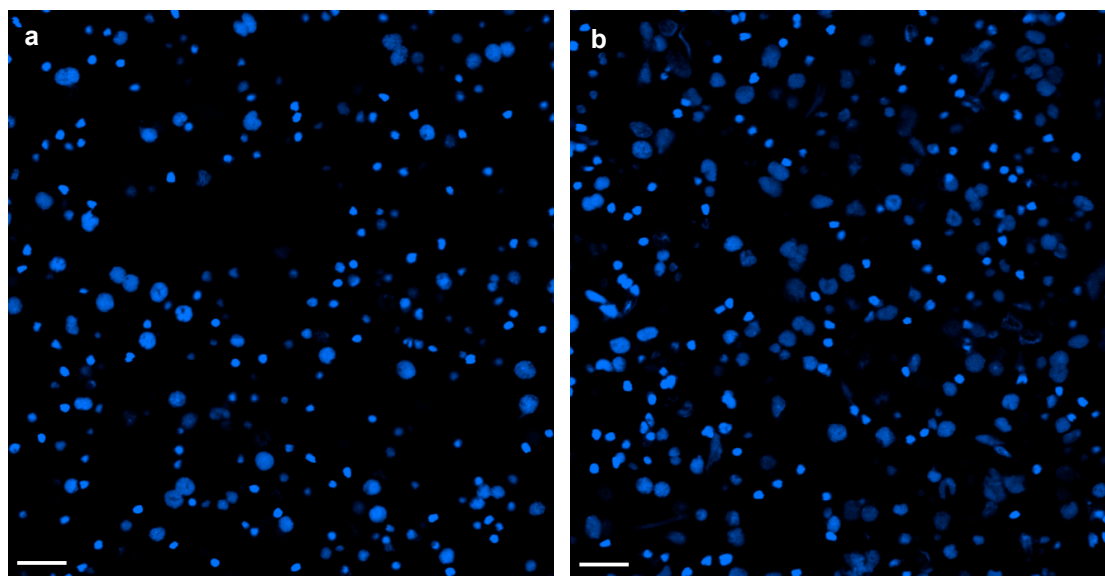

**Figure S2. The cell dissociation of cryopreserved cells and testis tissues in  
American shad**

For a pre-check of cell dissociation, the testicular cells were stained by Hoechst 33342 (MP Biomedicals) after cryopreservation (a), and isolated from the frozen testis tissues, then stained by Hoechst 33342 (b). Scale bars, 20  $\mu\text{m}$ .

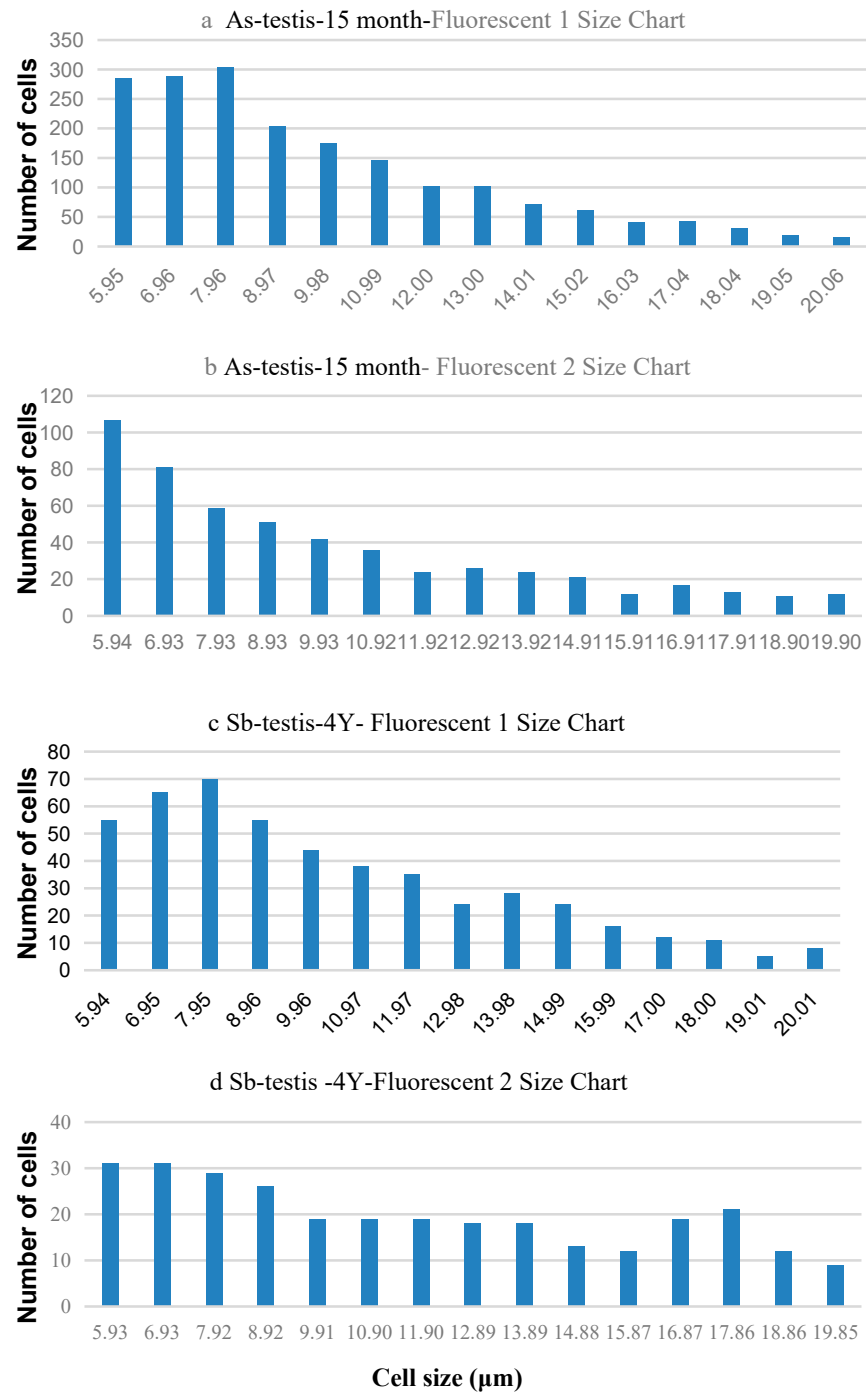

**Figure S3. The number of cells at different sizes counted by the Cellometer**
